# Supplementary material for: Towards the Improved Discovery and Design of Functional Peptides: Common Features of Diverse Classes Permit Generalized Prediction of Bioactivity
Source: PubMed Central journal article supplement (PMC3466233; doi:10.1371/journal.pone.0045012), 2012-10-08
Supplement: pone.0045012.s004.pdf [file pone.0045012.s004.pdf]

**Table S1. Independent test set with control peptide set selected from non-secreted proteins**

|                      | Long        |             |             |             |             | Short       |             |             |             |             |
|----------------------|-------------|-------------|-------------|-------------|-------------|-------------|-------------|-------------|-------------|-------------|
|                      | Spec        | Sen         | FPR         | Q           | MCC         | Spec        | Sen         | FPR         | Q           | MCC         |
| AntiBP2              |             |             |             |             |             |             |             |             |             |             |
| Non-secreted control | 64.1        | <b>91.8</b> | 0.51        |             |             | 66.0        | <b>88.6</b> | 0.47        |             |             |
| Bioactive            | 85.2        | 48.5        | <b>0.08</b> |             |             | <b>82.2</b> | 53.6        | <b>0.11</b> |             |             |
| All                  |             |             |             | 70.0        | 0.44        |             |             |             | 71.1        | 0.45        |
| CAMP                 |             |             |             |             |             |             |             |             |             |             |
| Non-secreted control | 64.0        | 68.7        | 0.39        |             |             | 61.7        | 77.8        | 0.49        |             |             |
| Bioactive            | 65.7        | 60.8        | 0.31        |             |             | 69.4        | 51.2        | 0.22        |             |             |
| All                  |             |             |             | 64.8        | 0.30        |             |             |             | 64.4        | 0.30        |
| PeptideRanker        |             |             |             |             |             |             |             |             |             |             |
| Non-secreted control | <b>85.9</b> | 89.0        | <b>0.15</b> |             |             | <b>73.2</b> | 84.2        | <b>0.31</b> |             |             |
| Bioactive            | <b>88.6</b> | <b>85.4</b> | 0.11        |             |             | 81.4        | <b>69.2</b> | 0.16        |             |             |
| All                  |             |             |             | <b>87.2</b> | <b>0.74</b> |             |             |             | <b>76.7</b> | <b>0.54</b> |

Comparison of PeptideRanker (measured at a threshold of 0.5), CAMP and AntiBP2 tested on the independent test set. AntiBP2 did not return predictions for 234 (out of a total of 946) of the long and 392 (out of a total of 532) of the short peptides. CAMP did not return predictions for 6 of the long and 5 of the short peptides.
