# Supplementary material for: Towards the Improved Discovery and Design of Functional Peptides: Common Features of Diverse Classes Permit Generalized Prediction of Bioactivity
Source: PubMed Central journal article supplement (PMC3466233; doi:10.1371/journal.pone.0045012), 2012-10-08
Supplement: pone.0045012.s005.pdf [file pone.0045012.s005.pdf]

**Table S2. Percentage amino acid composition of UniProt secreted and non-secreted proteins**

|   | Secreted | Non-secreted | Diff  |
|---|----------|--------------|-------|
| A | 6.75     | 6.75         | 0     |
| C | 3.93     | 1.58         | 2.35  |
| D | 5.20     | 5.20         | 0     |
| E | 5.91     | 7.14         | -1.23 |
| F | 3.74     | 3.74         | 0     |
| G | 7.43     | 6.15         | 1.28  |
| H | 2.34     | 2.45         | -0.11 |
| I | 4.28     | 5.37         | -1.09 |
| K | 5.61     | 6.80         | -1.19 |
| L | 8.78     | 9.25         | -0.47 |
| M | 2.05     | 2.23         | -0.18 |
| N | 4.47     | 4.49         | -0.02 |
| P | 5.81     | 5.35         | 0.46  |
| Q | 4.23     | 4.56         | -0.33 |
| R | 5.00     | 5.67         | -0.67 |
| S | 7.67     | 8.19         | -0.52 |
| T | 5.92     | 5.26         | 0.66  |
| V | 6.13     | 5.88         | 0.25  |
| W | 1.37     | 1.00         | 0.37  |
| Y | 3.35     | 2.92         | 0.43  |
