# Supplementary material for: Towards the Improved Discovery and Design of Functional Peptides: Common Features of Diverse Classes Permit Generalized Prediction of Bioactivity
Source: PubMed Central journal article supplement (PMC3466233; doi:10.1371/journal.pone.0045012), 2012-10-08
Supplement: pone.0045012.s006.pdf [file pone.0045012.s006.pdf]

**Table S3. Difference in amino acid composition between datasets**

|   | Bioactive long- |                    | Non-secreted long- |               | Secreted long-    |               | Bioactive long-    |                | Non-secreted long- |                | Secreted long-    |               | Bioactive short-  |               | Non-secreted short- |                | Secreted short-    |                | Avg Secreted Freq- |                 | Avg Secreted Freq- |                 | Uniprot Secreted-    |          |
|---|-----------------|--------------------|--------------------|---------------|-------------------|---------------|--------------------|----------------|--------------------|----------------|-------------------|---------------|-------------------|---------------|---------------------|----------------|--------------------|----------------|--------------------|-----------------|--------------------|-----------------|----------------------|----------|
|   | Bioactive short | Non-secreted short | Non-secreted long  | Secreted long | Non-secreted long | Secreted long | Non-secreted short | Secreted short | Non-secreted short | Secreted short | Non-secreted long | Secreted long | Non-secreted long | Secreted long | Non-secreted short  | Secreted short | Non-secreted short | Secreted short | Bioactive long     | Bioactive short | Bioactive long     | Bioactive short | Uniprot non-Secreted | Secreted |
| A | 0.2             | 0                  | 0.7                | 1             | 0.1               | 0.1           | 0.5                | 0.6            | 0.1                | 0.1            | 0.5               | 0.6           | -0.2              | 0             | 0                   | 0              | 0                  | 0              | -0.2               | 1.2             | 0.6                | 1.2             | 1.2                  | 0        |
| C | 0               | 0                  | 0.2                | 0.7           | 3.5               | 0.1           | 3.3                | 0.6            | 0.1                | 0.1            | 3.3               | 0.6           | 1.2               | 1.2           | 0.6                 | 0.6            | 0.6                | 0.6            | 1.2                | 1.2             | 0.6                | 1.2             | 2.4                  | 2.4      |
| D | 0.7             | 0                  | 1.2                | 0.3           | 0.5               | 0.2           | 0                  | 0.7            | 0.1                | 0.1            | 0                 | 0.7           | -0.4              | -0.4          | 0.7                 | 0.7            | 0.7                | 0.7            | -0.4               | -0.4            | 0.7                | -0.4            | 0                    | 0        |
| E | 3               | 3                  | 0.2                | 0.3           | 1.2               | 0.2           | 4.4                | 2.9            | 0.2                | 0.2            | 4.4               | 2.9           | -0.1              | -3.1          | 2.9                 | 2.9            | 2.9                | 2.9            | -0.1               | -3.1            | 2.9                | -0.1            | 1.2                  | 1.2      |
| F | 3.4             | 3.4                | 0.2                | 0.4           | 0.3               | 0.2           | 3.9                | 4              | 0.2                | 0.2            | 3.9               | 4             | 0.1               | 3.6           | 4                   | 4              | 4                  | 0.1            | 3.6                | 4               | 0.1                | 3.6             | 0                    | 0        |
| G | 2.5             | 0                  | 0                  | 0.6           | 1.2               | 0.4           | 3.6                | 3.5            | 0.4                | 0.4            | 3.6               | 3.5           | 0.1               | 2.6           | 3.5                 | 3.5            | 3.5                | 0.1            | 2.6                | 3.5             | 0.1                | 1.3             | 1.3                  | 1.3      |
| H | 0.4             | 0.4                | 0.4                | 0.1           | 0                 | 0.2           | 0.1                | 0.4            | 0.2                | 0.2            | 0.1               | 0.4           | 0                 | 0.4           | 0.4                 | 0.4            | 0.4                | 0              | 0.4                | 0.4             | 0                  | 0.4             | 0.1                  | 0.1      |
| I | 0               | 0                  | 0.5                | 0.1           | 1.4               | 0.1           | 0.8                | 0.3            | 0.1                | 0.1            | 0.8               | 0.3           | -0.2              | -0.2          | 0.3                 | 0.3            | 0.3                | -0.2           | -0.2               | 0.3             | -0.2               | 1.1             | 1.1                  | 1.1      |
| K | 0.6             | 0.6                | 0.7                | 0.1           | 0.4               | 0.1           | 1.7                | 0.6            | 0.1                | 0.1            | 1.7               | 0.6           | 0.8               | 0.2           | 0.6                 | 0.6            | 0.6                | 0.8            | 0.2                | 0.2             | 0.6                | 0.2             | 1.2                  | 1.2      |
| L | 0.6             | 0.6                | 0.6                | 0.6           | 0.3               | 0.8           | 0.3                | 0.8            | 0.8                | 0.8            | 0.3               | 0.8           | 0.4               | 1.1           | 0.8                 | 0.8            | 0.8                | 0.4            | 1.1                | 0.4             | 1.1                | 1.1             | 0.5                  | 0.5      |
| M | 0               | 0                  | 0.2                | 0.1           | 0.1               | 0.4           | 0.3                | 0.3            | 0.4                | 0.4            | 0.3               | 0.3           | 0.3               | 0.3           | 0.3                 | 0.3            | 0.3                | 0.3            | 0.3                | 0.3             | 0.3                | 0.2             | 0.2                  | 0.2      |
| N | 0.5             | 0.5                | 0.5                | 0             | 0.6               | 1             | 0.6                | 1.4            | 1                  | 1              | 0.6               | 1.4           | -0.6              | -1            | 1.4                 | 1.4            | 1.4                | -0.6           | -0.6               | 1.4             | -0.6               | -1              | 0                    | 0        |
| P | 1.3             | 1.3                | 0.2                | 0.2           | 0.2               | 0.3           | 1.1                | 1.3            | 0.3                | 0.3            | 1.1               | 1.3           | -0.4              | 1             | 1.3                 | 1.3            | 1.3                | -0.4           | -0.4               | 1.3             | 1                  | 1               | 0.5                  | 0.5      |
| Q | 0.7             | 0.7                | 0.7                | 0.6           | 0.6               | 0.4           | 1.9                | 0.5            | 0.4                | 0.4            | 1.9               | 0.5           | -0.4              | -1.1          | 0.5                 | 0.5            | 0.5                | -0.4           | -1.1               | 0.5             | -1.1               | 0.3             | 0.3                  | 0.3      |
| R | 0.1             | 0.1                | 0                  | 0.3           | 1.3               | 1.8           | 1.4                | 2.2            | 1.8                | 1.8            | 1.4               | 2.2           | 1.8               | 1.9           | 2.2                 | 2.2            | 2.2                | 1.8            | 1.9                | 1.8             | 1.9                | 0.7             | 0.7                  | 0.7      |
| S | 1.3             | 1.3                | 1                  | 0.4           | 0.8               | 0.2           | 1.1                | 1.5            | 0.2                | 0.2            | 1.1               | 1.5           | -0.1              | -1.4          | 1.5                 | 1.5            | 1.5                | -0.1           | -1.4               | 1.5             | -1.4               | 0.5             | 0.5                  | 0.5      |
| T | 2.1             | 2.1                | 0.2                | 0             | 0.3               | 0.9           | 2.2                | 3              | 0.9                | 0.9            | 2.2               | 3             | -1.1              | -3.3          | 3                   | 3              | 3                  | -1.1           | -3.3               | 3               | -3.3               | 0.7             | 0.7                  | 0.7      |
| V | 0.9             | 0.9                | 0.3                | 0.8           | 0.4               | 0.4           | 1                  | 2.1            | 0.4                | 0.4            | 1                 | 2.1           | -0.6              | -1.5          | 2.1                 | 2.1            | 2.1                | -0.6           | -1.5               | 2.1             | -1.5               | 0.2             | 0.2                  | 0.2      |
| W | 1.1             | 1.1                | 0.1                | 0.1           | 0.2               | 0.2           | 1.4                | 0.8            | 0.2                | 0.2            | 1.4               | 0.8           | -0.3              | 0.8           | 0.8                 | 0.8            | 0.8                | -0.3           | 0.8                | 0.8             | 0.8                | 0.4             | 0.4                  | 0.4      |
| Y | 0               | 0                  | 0.2                | 0.2           | 0.2               | 0.5           | 0.4                | 0.6            | 0.5                | 0.5            | 0.4               | 0.6           | -0.4              | -0.4          | 0.6                 | 0.6            | 0.6                | -0.4           | -0.4               | 0.6             | -0.4               | 0.4             | 0.4                  | 0.4      |

Percentage differences in amino acid content between the different datasets. The first seven columns and the last column are absolute values.
