# Supplementary material for: Towards the Improved Discovery and Design of Functional Peptides: Common Features of Diverse Classes Permit Generalized Prediction of Bioactivity
Source: PubMed Central journal article supplement (PMC3466233; doi:10.1371/journal.pone.0045012), 2012-10-08
Supplement: pone.0045012.s007.pdf [file pone.0045012.s007.pdf]

**Table S4. Pairwise correlations between amino acid composition and PeptideRanker scores**

|   | Long    | Short   | Diff    |
|---|---------|---------|---------|
| T | 0.0300  | -0.1752 | -0.2052 |
| V | -0.0159 | -0.1948 | -0.1789 |
| E | -0.1212 | -0.2913 | -0.1701 |
| K | 0.1093  | 0.0297  | -0.0796 |
| S | -0.0439 | -0.1112 | -0.0673 |
| R | 0.0013  | -0.0627 | -0.0640 |
| C | 0.4676  | 0.4043  | -0.0633 |
| H | -0.1788 | -0.2111 | -0.0323 |
| D | -0.1612 | -0.1900 | -0.0288 |
| Q | -0.0746 | -0.1012 | -0.0266 |
| L | -0.0428 | -0.0587 | -0.0159 |
| N | -0.0217 | -0.0367 | -0.0150 |
| I | -0.0272 | -0.0339 | -0.0067 |
| Y | 0.0046  | 0.0082  | 0.0036  |
| A | -0.0927 | -0.0578 | 0.0349  |
| W | 0.0454  | 0.1382  | 0.0928  |
| G | 0.0272  | 0.1412  | 0.1140  |
| M | -0.0834 | 0.0370  | 0.1204  |
| P | -0.0196 | 0.1270  | 0.1466  |
| F | -0.1530 | 0.1699  | 0.3229  |

Pearson correlation coefficient for long and short peptides between amino acid composition and PeptideRanker scores, and the difference (Diff) between long and short correlations.
