# Supplementary material for: Towards the Improved Discovery and Design of Functional Peptides: Common Features of Diverse Classes Permit Generalized Prediction of Bioactivity
Source: PubMed Central journal article supplement (PMC3466233; doi:10.1371/journal.pone.0045012), 2012-10-08
Supplement: pone.0045012.s008.pdf [file pone.0045012.s008.pdf]

**Table S5. Independent test set with a control peptide set of scrambled bioactive peptides**

|                   | Long |      |      |      |      | Short |      |      |      |       |
|-------------------|------|------|------|------|------|-------|------|------|------|-------|
|                   | Spec | Sen  | FPR  | Q    | MCC  | Spec  | Sen  | FPR  | Q    | MCC   |
| AntiBP2           |      |      |      |      |      |       |      |      |      |       |
| Scrambled control | 49.9 | 50.8 | 0.51 |      |      | 50.0  | 45.7 | 0.47 |      |       |
| Bioactive         | 49.7 | 48.7 | 0.49 |      |      | 48.7  | 52.9 | 0.54 |      |       |
| All               |      |      |      | 49.8 | 0.00 |       |      |      | 49.3 | -0.01 |
| CAMP              |      |      |      |      |      |       |      |      |      |       |
| Scrambled control | 50.4 | 39.8 | 0.39 |      |      | 53.1  | 55.4 | 0.49 |      |       |
| Bioactive         | 50.3 | 60.8 | 0.60 |      |      | 53.4  | 51.2 | 0.45 |      |       |
| All               |      |      |      | 50.3 | 0.01 |       |      |      | 53.2 | 0.06  |
| PeptideRanker     |      |      |      |      |      |       |      |      |      |       |
| Scrambled control | 75.7 | 45.5 | 0.15 |      |      | 57.3  | 41.4 | 0.31 |      |       |
| Bioactive         | 61.0 | 85.4 | 0.55 |      |      | 54.1  | 69.2 | 0.59 |      |       |
| All               |      |      |      | 65.4 | 0.34 |       |      |      | 55.3 | 0.11  |

Comparison of PeptideRanker (measured at a threshold of 0.5), CAMP and AntiBP2 tested on the independent test set. The control peptides are generated by scrambling the bioactive peptide set i.e. the amino acid composition of both the control and the bioactive set is the same. AntiBP2 did not return predictions for 234 of the long and 393 of the short peptides. CAMP did not return predictions for 12 of the long and 8 of the short peptides.
