# Supplementary material for: Towards the Improved Discovery and Design of Functional Peptides: Common Features of Diverse Classes Permit Generalized Prediction of Bioactivity
Source: PubMed Central journal article supplement (PMC3466233; doi:10.1371/journal.pone.0045012), 2012-10-08
Supplement: pone.0045012.s009.pdf [file pone.0045012.s009.pdf]

**Table S6. Independent test set with control peptide set from secreted proteins**

|                  | Long |      |      |      |      | Short |      |      |      |      |
|------------------|------|------|------|------|------|-------|------|------|------|------|
|                  | Spec | Sen  | FPR  | Q    | MCC  | Spec  | Sen  | FPR  | Q    | MCC  |
| AntiBP2          |      |      |      |      |      |       |      |      |      |      |
| Secreted control | 59.6 | 73.0 | 0.51 |      |      | 60.5  | 71.0 | 0.47 |      |      |
| Bioactive        | 63.6 | 48.7 | 0.27 |      |      | 64.3  | 52.9 | 0.29 |      |      |
| All              |      |      |      | 60.9 | 0.22 |       |      |      | 62.0 | 0.24 |
| CAMP             |      |      |      |      |      |       |      |      |      |      |
| Secreted control | 61.3 | 62.0 | 0.39 |      |      | 59.2  | 70.7 | 0.49 |      |      |
| Bioactive        | 61.5 | 60.8 | 0.38 |      |      | 63.5  | 51.2 | 0.29 |      |      |
| All              |      |      |      | 61.4 | 0.23 |       |      |      | 60.9 | 0.22 |
| PeptideRanker    |      |      |      |      |      |       |      |      |      |      |
| Secreted control | 77.9 | 51.4 | 0.15 |      |      | 70.2  | 72.5 | 0.31 |      |      |
| Bioactive        | 63.7 | 85.4 | 0.49 |      |      | 71.6  | 69.2 | 0.27 |      |      |
| All              |      |      |      | 68.4 | 0.39 |       |      |      | 70.9 | 0.42 |

Comparison of PeptideRanker (measured at a threshold of 0.5), CAMP and AntiBP2 tested on the independent test set, with control peptides randomly selected from secreted proteins. AntiBP2 did not return predictions for 223 of the long and 394 of the short peptides. CAMP did not return predictions for 11 of the long and 7 of the short peptides.
