# Supplementary material for: Towards the Improved Discovery and Design of Functional Peptides: Common Features of Diverse Classes Permit Generalized Prediction of Bioactivity
Source: PubMed Central journal article supplement (PMC3466233; doi:10.1371/journal.pone.0045012), 2012-10-08
Supplement: pone.0045012.s011.pdf [file pone.0045012.s011.pdf]

**Table S8. Prediction of peptide hormones**

|               | Long |      |      |      |      | Short |      |      |      |       |
|---------------|------|------|------|------|------|-------|------|------|------|-------|
|               | Spec | Sen  | FPR  | Q    | MCC  | Spec  | Sen  | FPR  | Q    | MCC   |
| AntiBP2       |      |      |      |      |      |       |      |      |      |       |
| Control       | 51.5 | 90.5 | 0.85 |      |      | 48.8  | 91.3 | 0.96 |      |       |
| Bioactive     | 60.6 | 14.6 | 0.09 |      |      | 33.3  | 4.4  | 0.09 |      |       |
| All           |      |      |      | 52.6 | 0.08 |       |      |      | 47.8 | -0.09 |
| CAMP          |      |      |      |      |      |       |      |      |      |       |
| Control       | 52.7 | 51.4 | 0.47 |      |      | 54.3  | 76.7 | 0.65 |      |       |
| Bioactive     | 51.6 | 52.9 | 0.49 |      |      | 60.2  | 35.3 | 0.23 |      |       |
| All           |      |      |      | 52.2 | 0.04 |       |      |      | 56.0 | 0.13  |
| PeptideRanker |      |      |      |      |      |       |      |      |      |       |
| Control       | 82.1 | 88.9 | 0.19 |      |      | 77.0  | 84.7 | 0.25 |      |       |
| Bioactive     | 87.9 | 80.6 | 0.11 |      |      | 83.0  | 74.7 | 0.15 |      |       |
| All           |      |      |      | 84.8 | 0.70 |       |      |      | 79.7 | 0.60  |

Comparison of AntiBP2, CAMP and PeptideRanker tested on the PeptideDB.70 Peptide hormone activity class subset of the independent test set. AntiBP2 did not return predictions for 212 of the 486 long and 254 of the 300 short peptides. CAMP did not return predictions for five of the long peptides. Statistics were calculated on the subset of peptides for which predictions were available.
