# Supplementary material for: Towards the Improved Discovery and Design of Functional Peptides: Common Features of Diverse Classes Permit Generalized Prediction of Bioactivity
Source: PubMed Central journal article supplement (PMC3466233; doi:10.1371/journal.pone.0045012), 2012-10-08
Supplement: pone.0045012.s012.pdf [file pone.0045012.s012.pdf]

**Table S9. Prediction of toxin/venom peptides**

|               | Long |      |      |      |      | Short |      |      |      |      |
|---------------|------|------|------|------|------|-------|------|------|------|------|
|               | Spec | Sen  | FPR  | Q    | MCC  | Spec  | Sen  | FPR  | Q    | MCC  |
| AntiBP2       |      |      |      |      |      |       |      |      |      |      |
| Control       | 76.5 | 92.6 | 0.28 |      |      | 63.2  | 80.0 | 0.47 |      |      |
| Bioactive     | 90.6 | 71.6 | 0.07 |      |      | 72.7  | 53.3 | 0.20 |      |      |
| All           |      |      |      | 82.1 | 0.66 |       |      |      | 66.7 | 0.35 |
| CAMP          |      |      |      |      |      |       |      |      |      |      |
| Control       | 70.8 | 92.6 | 0.38 |      |      | 77.8  | 84.9 | 0.24 |      |      |
| Bioactive     | 89.3 | 61.7 | 0.07 |      |      | 83.9  | 76.5 | 0.15 |      |      |
| All           |      |      |      | 77.2 | 0.57 |       |      |      | 80.7 | 0.61 |
| PeptideRanker |      |      |      |      |      |       |      |      |      |      |
| Control       | 98.6 | 88.9 | 0.01 |      |      | 78.8  | 76.5 | 0.20 |      |      |
| Bioactive     | 89.9 | 98.8 | 0.11 |      |      | 77.1  | 79.4 | 0.23 |      |      |
| All           |      |      |      | 93.8 | 0.88 |       |      |      | 77.9 | 0.56 |

Comparison of AntiBP2, CAMP and PeptideRanker tested on the PeptideDB.70 Toxin/Venom peptide activity class subset of the independent test set. AntiBP2 did not return predictions for 38 of the 68 short peptides. CAMP did not return a prediction for one of the short peptides. Statistics were calculated on the subset of peptides for which predictions were available.
