# Supplementary material for: Towards the Improved Discovery and Design of Functional Peptides: Common Features of Diverse Classes Permit Generalized Prediction of Bioactivity
Source: PubMed Central journal article supplement (PMC3466233; doi:10.1371/journal.pone.0045012), 2012-10-08
Supplement: pone.0045012.s013.pdf [file pone.0045012.s013.pdf]

**Table S10. Performance of three class peptide activity predictor measured in five-fold cross-validation on the peptide activity subsets of the full training datasets at a threshold of 0.5**

|                 | Long |      |      |      |      | Short |      |      |      |      |
|-----------------|------|------|------|------|------|-------|------|------|------|------|
|                 | Num  | Spec | Sen  | MCC  | FPR  | Num   | Spec | Sen  | MCC  | FPR  |
| Antimicrobial   | 797  | 79.1 | 68.9 | 0.67 | 5    | 916   | 65.4 | 53.7 | 0.53 | 5.0  |
| Peptide Hormone | 2186 | 88.6 | 93.3 | 0.77 | 17.3 | 2790  | 90.1 | 93.7 | 0.72 | 24.1 |
| Toxin/Venom     | 728  | 86.9 | 85   | 0.83 | 3.2  | 866   | 79.2 | 76.0 | 0.73 | 3.7  |
| All             | 3711 | Q    | 86.4 | GC   | 0.76 | 4572  | Q    | 85.4 | GC   | 0.66 |

The number of peptides per class (Num), Specificity (Spec), Sensitivity (Sens), Matthews Correlation Coefficient (MCC) and False Positive Rate (FPR) measured for the three peptide activity classes. Accuracy ( $Q$ ) and Generalised Correlation (GC) are measured over all peptides. See the Materials and Methods section for definitions.
