# Supplementary material for: Towards the Improved Discovery and Design of Functional Peptides: Common Features of Diverse Classes Permit Generalized Prediction of Bioactivity
Source: PubMed Central journal article supplement (PMC3466233; doi:10.1371/journal.pone.0045012), 2012-10-08
Supplement: pone.0045012.s014.pdf [file pone.0045012.s014.pdf]

**Table S11. Number of peptides and average peptide length per class**

|             | Training/Test Set |       | Independent Test Set |       |
|-------------|-------------------|-------|----------------------|-------|
|             | Long              | Short | Long                 | Short |
| Control     | 4258              | 1064  | 473                  | 266   |
| Bioactive   | 4258              | 1064  | 473                  | 266   |
| Avg. length | 78.0              | 12.1  | 75.6                 | 12.0  |
