# Supplementary material for: Towards the Improved Discovery and Design of Functional Peptides: Common Features of Diverse Classes Permit Generalized Prediction of Bioactivity
Source: PubMed Central journal article supplement (PMC3466233; doi:10.1371/journal.pone.0045012), 2012-10-08
Supplement: pone.0045012.s015.pdf [file pone.0045012.s015.pdf]

**Table S12. Number of bioactive and control peptides per activity class**

|                 | Long      |         |       | Short     |         |       |
|-----------------|-----------|---------|-------|-----------|---------|-------|
|                 | Bioactive | Control | Total | Bioactive | Control | Total |
| Antimicrobial   | 88        | 88      | 176   | 29        | 29      | 58    |
| Peptide Hormone | 243       | 243     | 486   | 150       | 150     | 300   |
| Toxin/Venom     | 81        | 81      | 162   | 34        | 34      | 68    |
| Total           | 412       | 412     | 824   | 213       | 213     | 426   |

Number of bioactive and control peptides per activity class in the PeptideDB.70 subset of the independent test sets (see Figures 4 and 5).
