# Supplementary material for: Towards the Improved Discovery and Design of Functional Peptides: Common Features of Diverse Classes Permit Generalized Prediction of Bioactivity
Source: PubMed Central journal article supplement (PMC3466233; doi:10.1371/journal.pone.0045012), 2012-10-08
Supplement: pone.0045012.s016.pdf [file pone.0045012.s016.pdf]

**Table S13. Network parameters**

|         | Long |    |    | Short |    |    |
|---------|------|----|----|-------|----|----|
|         | V0   | V1 | V2 | V0    | V1 | V2 |
| $N_f$   | 9    | 10 | 11 | 5     | 6  | 7  |
| $N_o^H$ | 9    | 10 | 11 | 5     | 6  | 7  |
| $N_f^H$ | 9    | 10 | 11 | 5     | 6  | 7  |
| $c$     | 20   | 20 | 20 | 10    | 10 | 10 |

$N_f$ : size of the feature vector;  $N_o^H$ : number of hidden units in the feature-to-output network;  $N_f^H$ : number of hidden units in the peptide-to-feature network;  $c$  is the context i.e.  $2c + 1$  is the size of the window being considered.
